# Supplementary material for: 3D MnIIcoordination polymer with alternating azide/azide/formate/formate bridged chains: synthesis, structure and magnetic properties
Source: Royal Society of Chemistry journal article supplement (doi:10.1039/b919048a), 2009-11-03
Supplement: b919048a.pdf [file b919048a.pdf]

## Electronic Supporting Information ( ESI )

### 3D Mn<sup>II</sup> Coordination Polymer with Alternating Azide/Azide/Formate/Formate bridged Chains: Synthesis, Structure, and Magnetic Properties

Jiong-Peng Zhao, Bo-Wen Hu, Qian Yang, Xiao Feng Zhang, Tong-Liang Hu, Xian-He Bu\*

**Table S1.** The selected bond lengths [Å] and angles [deg] for complex **1**.

|                   |          |                   |          |
|-------------------|----------|-------------------|----------|
| Mn(1)-O(3)        | 2.123(5) | Mn(2)-O(4)#3      | 2.169(5) |
| Mn(1)-O(5)#1      | 2.146(5) | Mn(2)-O(6)        | 2.176(5) |
| Mn(1)-O(6)        | 2.156(5) | Mn(2)-O(6)#3      | 2.176(5) |
| Mn(1)-O(7)#2      | 2.159(5) | Mn(3)-O(8)#2      | 2.112(5) |
| Mn(1)-N(1)        | 2.225(6) | Mn(3)-O(8)#4      | 2.112(5) |
| Mn(1)-O(1)        | 2.250(5) | Mn(3)-O(1)#5      | 2.192(5) |
| Mn(2)-O(2)#3      | 2.133(6) | Mn(3)-O(1)        | 2.192(5) |
| Mn(2)-O(2)        | 2.133(6) | Mn(3)-N(1)        | 2.253(7) |
| Mn(2)-O(4)        | 2.169(5) | Mn(3)-N(1)#5      | 2.253(7) |
| O(3)-Mn(1)-O(5)#1 | 95.4(2)  | O(2)-Mn(2)-O(6)   | 90.5(2)  |
| O(3)-Mn(1)-O(6)   | 89.5(2)  | O(4)-Mn(2)-O(6)   | 91.4(2)  |
| O(5)#1-Mn(1)-O(6) | 87.3(2)  | O(4)#3-Mn(2)-O(6) | 88.6(2)  |

---

|                     |            |                     |            |
|---------------------|------------|---------------------|------------|
| O(3)-Mn(1)-O(7)#2   | 173.3(2)   | O(2)#3-Mn(2)-O(6)#3 | 90.5(2)    |
| O(5)#1-Mn(1)-O(7)#2 | 91.2(2)    | O(2)-Mn(2)-O(6)#3   | 89.5(2)    |
| O(6)-Mn(1)-O(7)#2   | 89.9(2)    | O(4)-Mn(2)-O(6)#3   | 88.6(2)    |
| O(3)-Mn(1)-N(1)     | 88.4(2)    | O(4)#3-Mn(2)-O(6)#3 | 91.4(2)    |
| O(5)#1-Mn(1)-N(1)   | 99.5(2)    | O(6)-Mn(2)-O(6)#3   | 180.0(2)   |
| O(6)-Mn(1)-N(1)     | 173.0(2)   | O(8)#2-Mn(3)-O(8)#4 | 180.000(1) |
| O(7)#2-Mn(1)-N(1)   | 91.5(2)    | O(8)#2-Mn(3)-O(1)#5 | 93.7(2)    |
| O(3)-Mn(1)-O(1)     | 87.8(2)    | O(8)#4-Mn(3)-O(1)#5 | 86.3(2)    |
| O(5)#1-Mn(1)-O(1)   | 176.36(19) | O(8)#2-Mn(3)-O(1)   | 86.3(2)    |
| O(6)-Mn(1)-O(1)     | 91.08(19)  | O(8)#4-Mn(3)-O(1)   | 93.7(2)    |
| O(7)#2-Mn(1)-O(1)   | 85.6(2)    | O(1)#5-Mn(3)-O(1)   | 180.000(1) |
| N(1)-Mn(1)-O(1)     | 82.2(2)    | O(8)#2-Mn(3)-N(1)   | 90.1(2)    |
| O(2)#3-Mn(2)-O(2)   | 180.0(2)   | O(8)#4-Mn(3)-N(1)   | 89.9(2)    |
| O(2)#3-Mn(2)-O(4)   | 92.6(3)    | O(1)#5-Mn(3)-N(1)   | 97.1(2)    |
| O(2)-Mn(2)-O(4)     | 87.4(3)    | O(1)-Mn(3)-N(1)     | 82.9(2)    |
| O(2)#3-Mn(2)-O(4)#3 | 87.4(3)    | O(8)#2-Mn(3)-N(1)#5 | 89.9(2)    |
| O(2)-Mn(2)-O(4)#3   | 92.6(3)    | O(8)#4-Mn(3)-N(1)#5 | 90.1(2)    |
| O(4)-Mn(2)-O(4)#3   | 180.000(1) | O(1)#5-Mn(3)-N(1)#5 | 82.9(2)    |
| O(2)#3-Mn(2)-O(6)   | 89.5(2)    | O(1)-Mn(3)-N(1)#5   | 97.1(2)    |
| N(1)-Mn(3)-N(1)#5   | 180.000(1) |                     |            |

#1 -x+1,-y+1,-z+1    #2 -x,-y+1,-z    #3 -x+1,-y+1,-z

#4 x+1,y+1,z+1    #5 -x+1,-y+2,-z+1

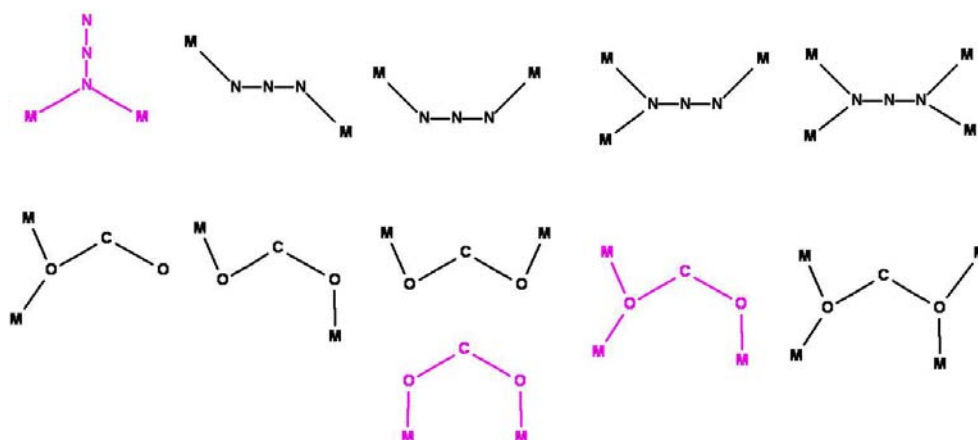

**Chart 1.** The frequent coordination modes of the ligands azide carboxylate (including formate). The modes in pink color were those presented in complex **1**.

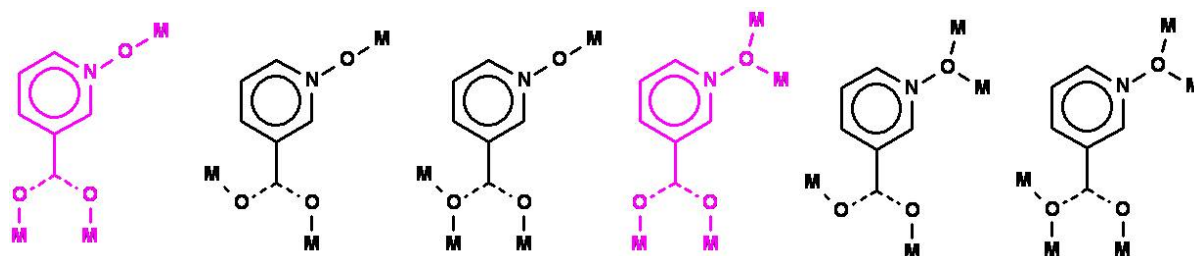

**Chart 2.** The frequent coordination modes of nicotinate N-oxide.

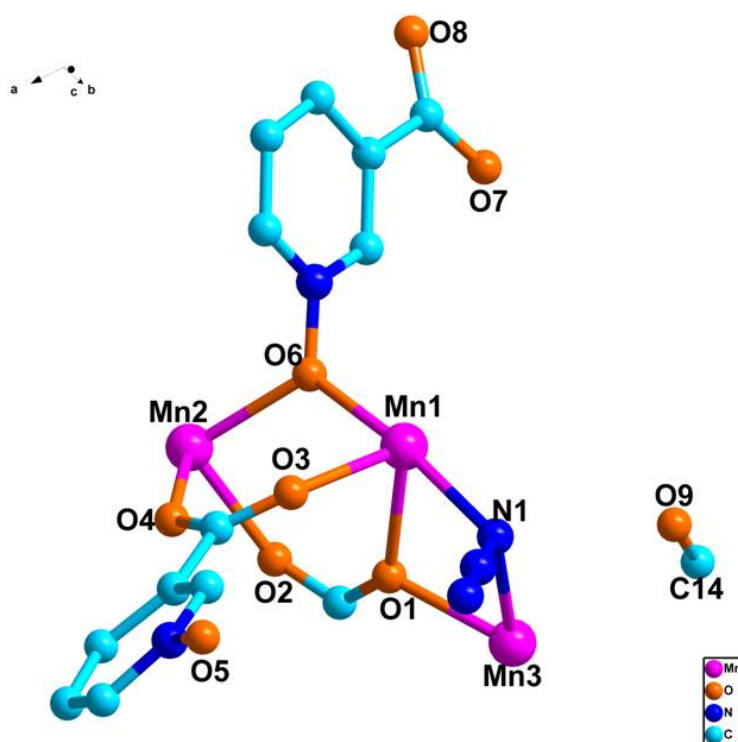

**Figure S1.** The asymmetry unit of complex 1.

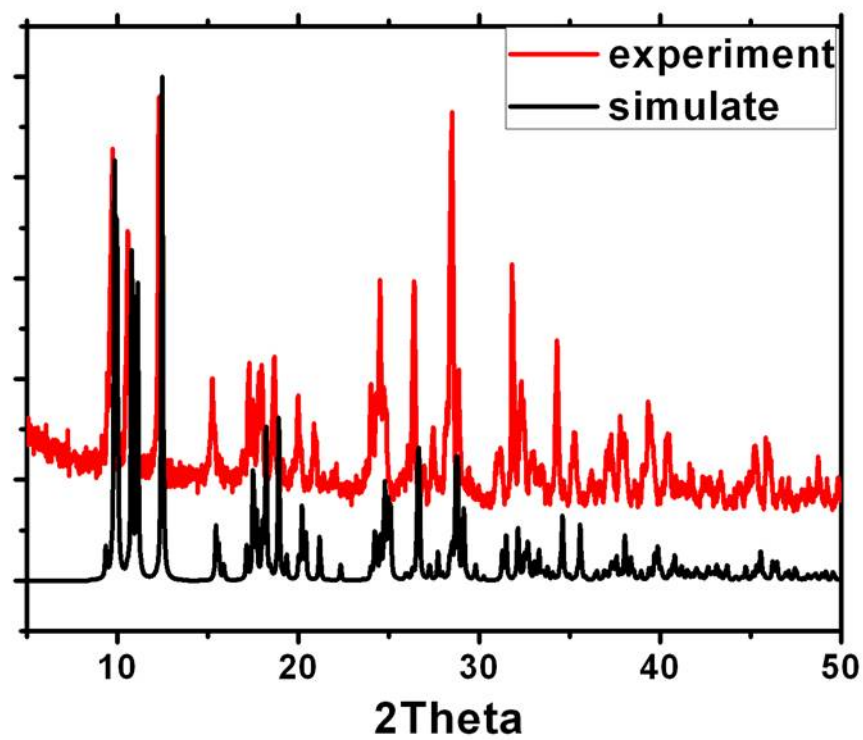

**Figure S2.** The XRPD diagram of complex 1.

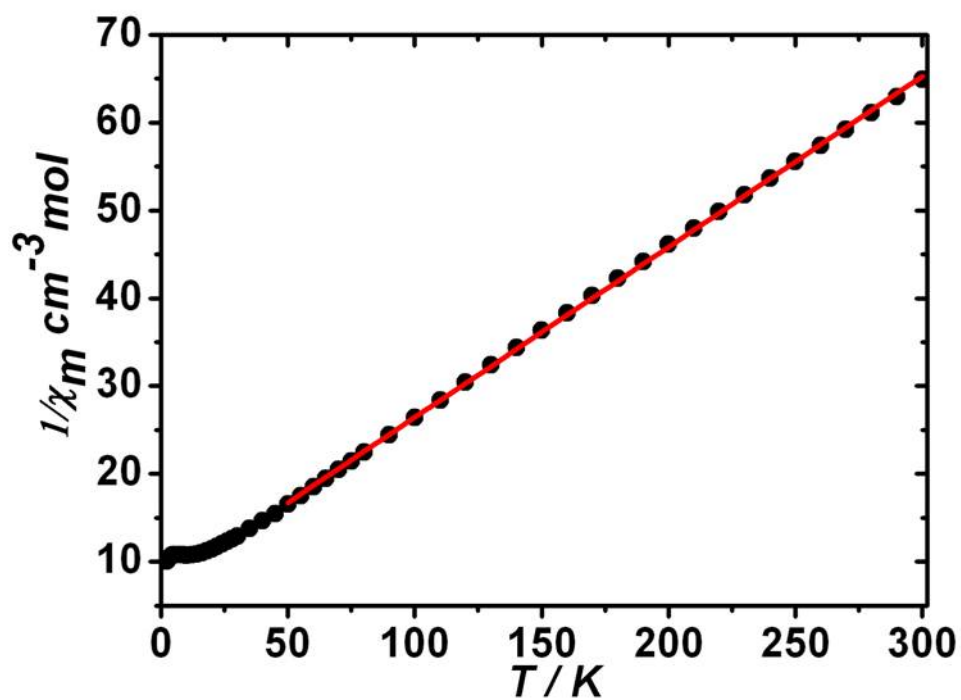

**Figure S3.** Curie plot for complex 1. The solid line is the best fit to the Curie-Weiss law.

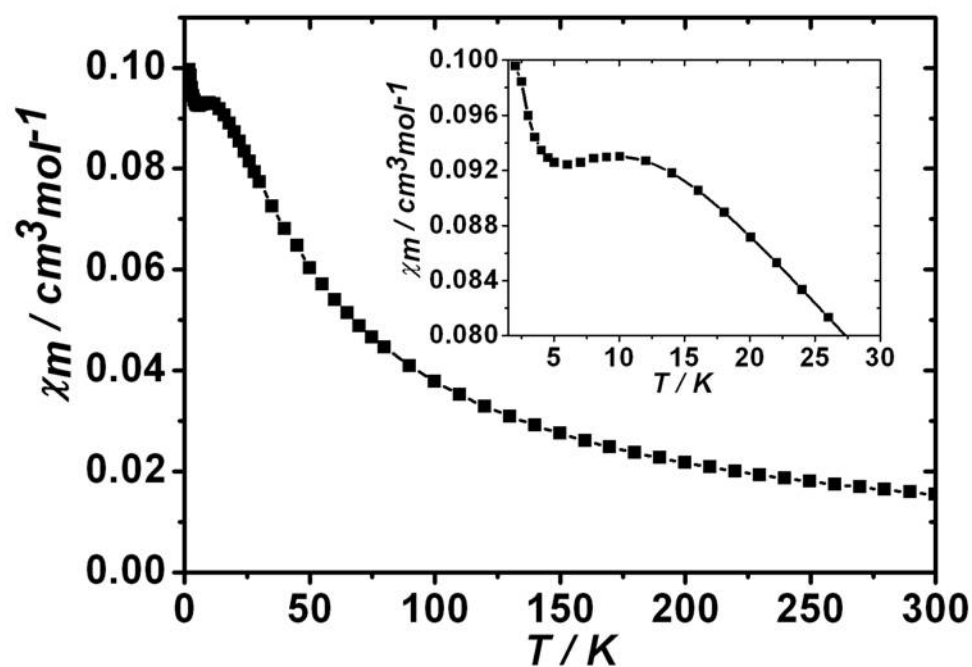

**Figure S4.** The  $\chi_m$  VS.  $T$  plot for complex 1.

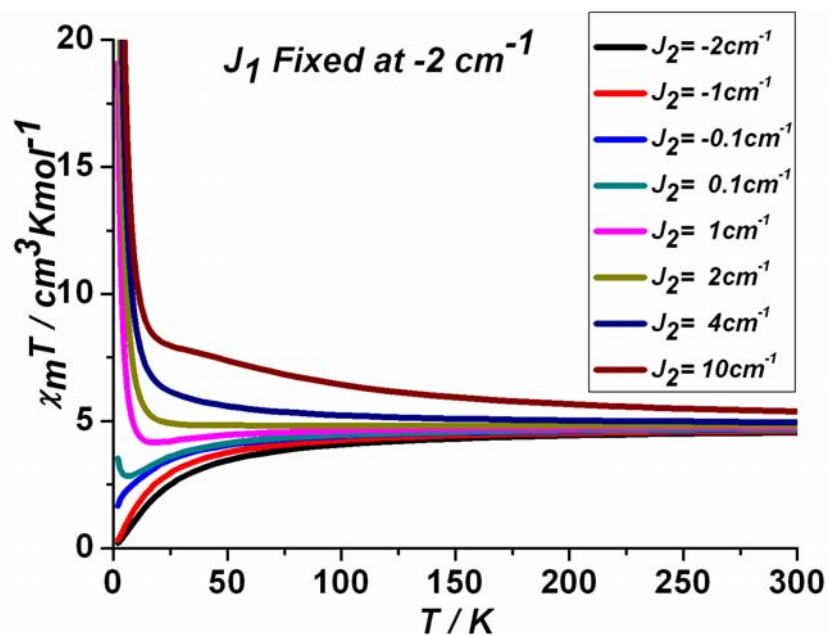

(a)

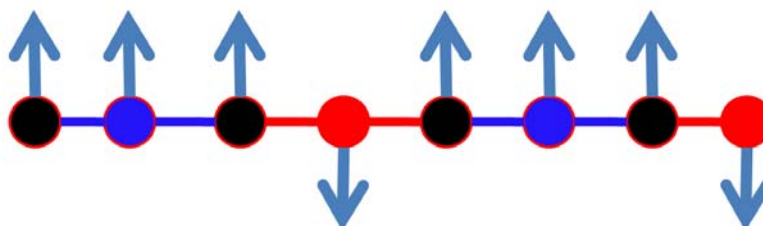

(b)

**Figure S5.** (a) Simulation of the magnetic behavior of a  $J_1/J_1/J_2/J_2$  1D system for a set of the  $J_2/J_1$  ratio between -1 and 5.0. A constant value of  $J_1 = -2 \text{ cm}^{-1}$  has been assumed in the simulations. (b) Proposed schematic representation of the spin alignment in the  $J_1/J_1/J_2/J_2$  1D system for the  $J_1$  and  $J_2$  signing opposite.
